# Supplementary figures and images for: Landscape of the gut mycobiome dynamics during pregnancy and its relationship with host metabolism and pregnancy health
Source: HighWire-hosted journal article supplement (doi:10.1136/gutjnl-2024-332260), 2024-05-09

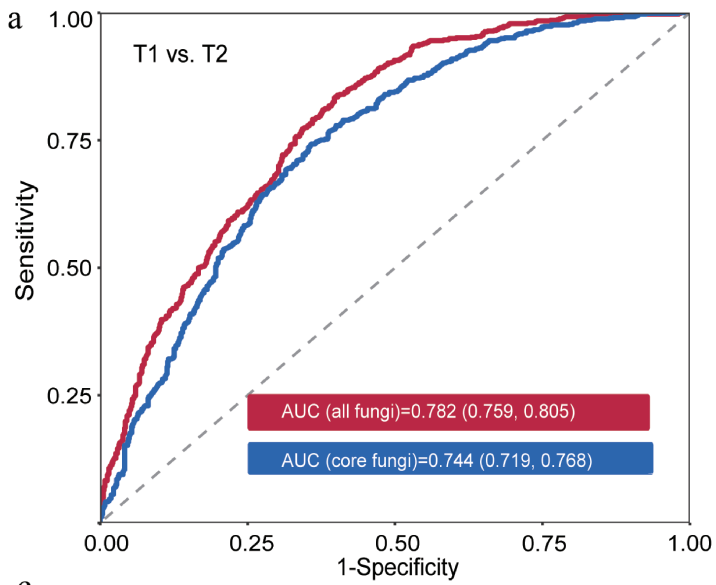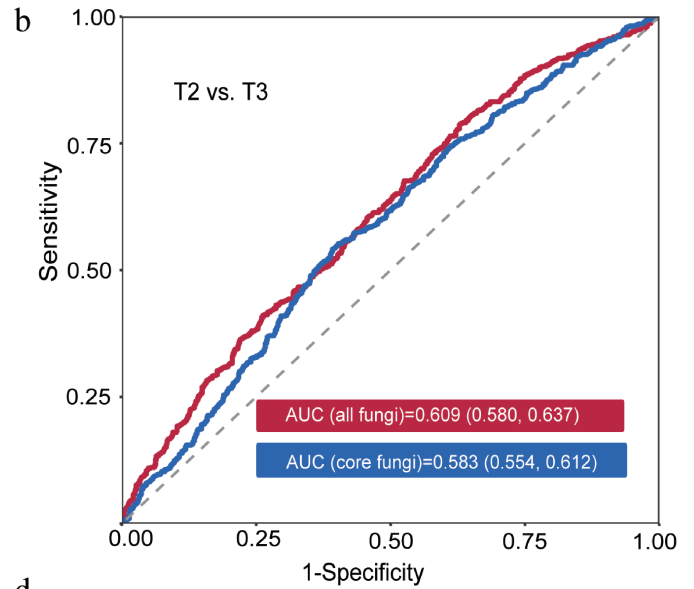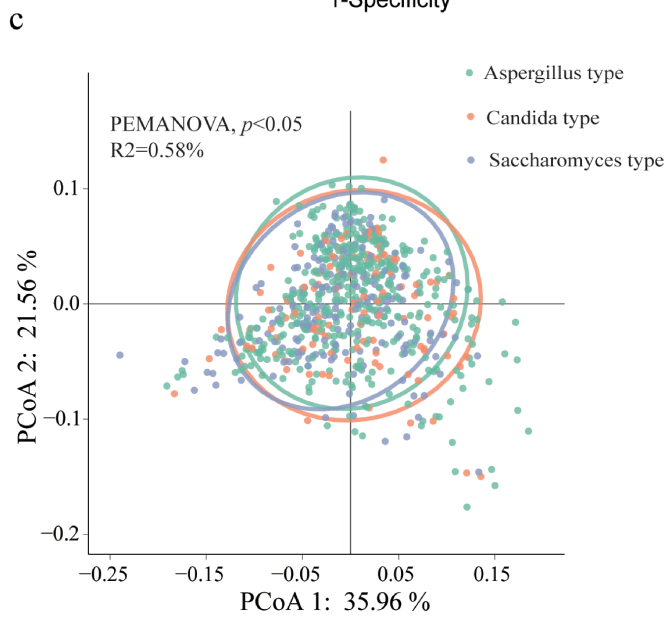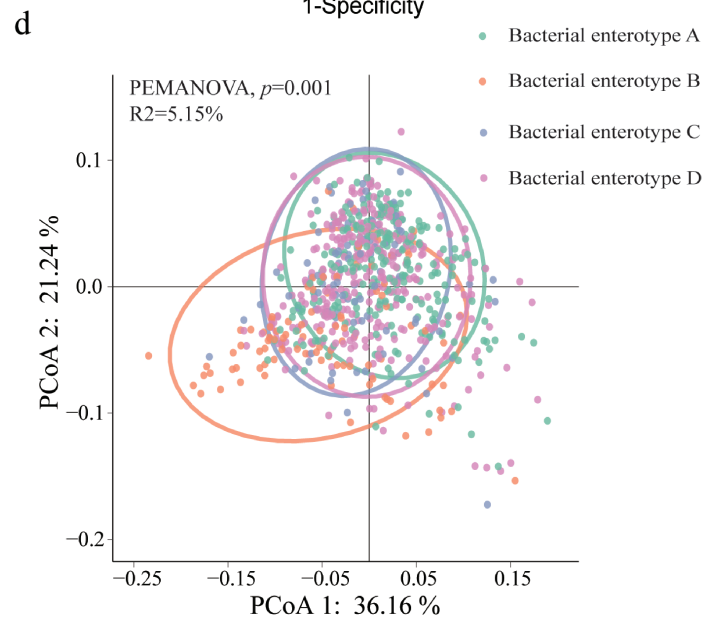

Supplement: gutjnl-2024-332260supp002_data_supplement.pdf [file gutjnl-2024-332260supp002_data_supplement.pdf]

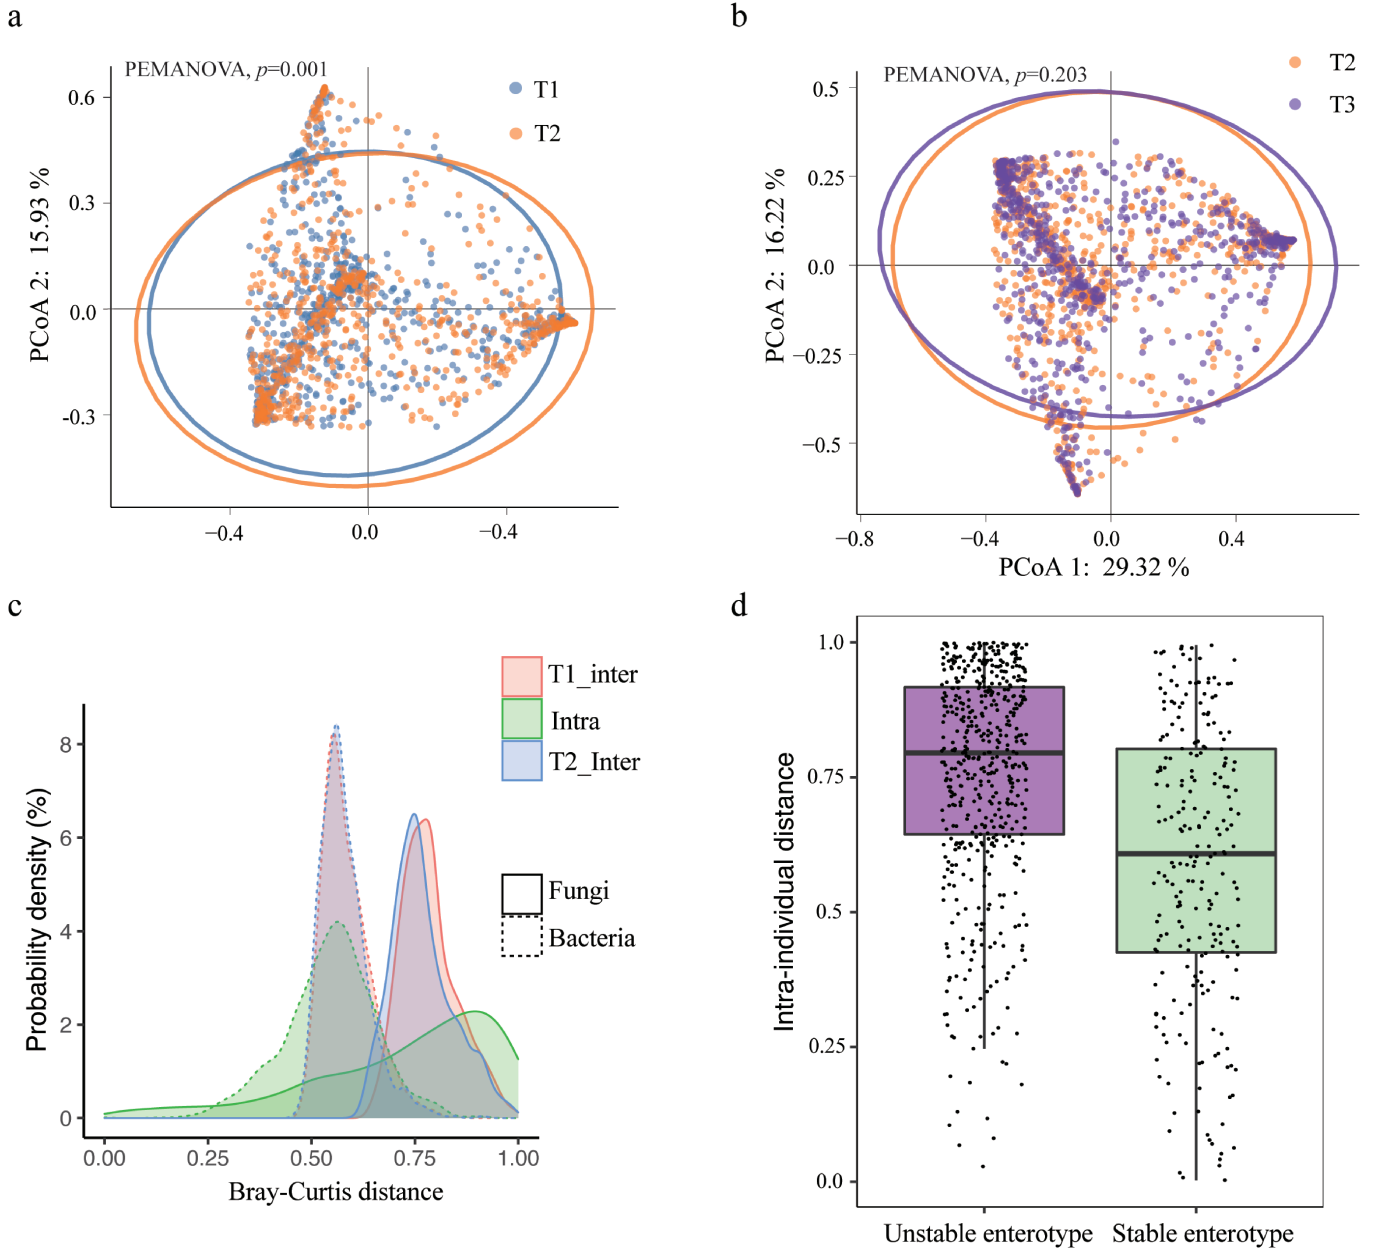

Supplement: gutjnl-2024-332260supp001_data_supplement.pdf [file gutjnl-2024-332260supp001_data_supplement.pdf]
